# Supplementary material for: Invasive and Noninvasive Nonfunctioning Gonadotroph Pituitary Tumors Differ in DNA Methylation Level of LINE-1 Repetitive Elements
Source: J Clin Med. 2021 Feb 3;10(4):560. doi: 10.3390/jcm10040560 (PMC7913198; doi:10.3390/jcm10040560)
Supplement: Supplementary file 1 [file jcm-10-00560-s001.xlsx]

## Sheet: Patients characteristics
Supplementary Table S1. Detail characteristics of piatients with gonadotroph nonfunctioning PitNETs
		Demographical data		Diagnosis	Clinical features						Hormone immunostaining						proliferation	Included in HM450K profiling	Molecular results
	code	sex	age (years)	subtype	invasive	Knosp grade	tumor size	newly diagnosed/recurrent	recurrence during follow-up	GH	PRL	ACTH	TSH	FSH	LH	α-su	Ki67		Line-1 DNA methylation levels	relative L1-ORF1 expression level	relative L1-ORF2 expression level
1	1/13	M	60	gonadotroph adenoma with oncocytic features	-	2	M	newly diagnosed	-	-	-	-	-	+	+	-	<3%	+	67.9 %	32	36.3
2	1/14	M	68	gonadotroph adenoma	+	3	M	newly diagnosed	-	-	-	-	-	+	+	-	<3%	+	73.8 %	111	213.5
3	10/13	F	43	gonadotroph adenoma	+	3	M	newly diagnosed	+	-	-	-	-	-	+/-	+	>3%	+	49.9 %	223.1	302.5
4	10/14	F	56	gonadotroph adenoma	-	1	M	newly diagnosed	-	-	-	-	-	+/-	+	+/-	<3%	+	66.8 %	1.3	1.1
5	13/14	F	67	plurihormonal (TSH,FSH,LH,α)	-	2	m	newly diagnosed	-	-	-	-	+	+	+	+	<3%	+	73.7 %	8.3	8
6	15/13	M	44	gonadotroph adenoma	+	2	M	newly diagnosed	-	-	-	-	-	+	+	+/-	<1%	+	76.4 %	1.4	2.9
7	16/14	F	54	gonadotroph adenoma	-	2	M	newly diagnosed	-	-	-	-	-	-	+	+/-	>3%	+	71.6 %	2.3	3.1
8	24/14	M	57	gonadotroph adenoma	-	2	M	newly diagnosed	-	-	-	-	-	-	+	-	<1%	+	75.4 %	37	39.1
9	35/11	M	55	gonadotroph adenoma	-	2	M	newly diagnosed	-	-	-	-	-	+	+	+	<1%	+	72.4 %	-	-
10	37/12	M	68	gonadotroph adenoma	-	2	M	newly diagnosed	-	-	-	-	-	+	+	+	<1%	+	74.1 %	12.7	16.8
11	37/14	F	75	gonadotroph adenoma	+	3	M	newly diagnosed	-	-	-	-	-	-	+/-	+	<1%	+	72.6 %	163.5	148.6
12	40/14	M	46	gonadotroph adenoma	+	4	M	newly diagnosed	-	-	-	-	-	-	+	+	<1%	+	67.8 %	1	1.5
13	44/14	F	59	gonadotroph adenoma	+	2	M	newly diagnosed	-	-	-	-	-	+	-	-	<1%	+	62.8 %	113.7	138.9
14	46/12	M	36	gonadotroph adenoma	+	3	m	recurrent	-	-	-	-	-	+	+	-	<1%	+	67.3 %	2	3.1
15	5/13	M	73	gonadotroph adenoma with oncocytic features	+	3	M	newly diagnosed	-	-	-	-	-	+	+	+	<1%	+	71.2 %	1.7	2.2
16	55/14	M	50	gonadotroph adenoma with oncocytic features	-	2	M	newly diagnosed	-	-	-	-	-	+/-	+/-	-	<1%	+	76.5 %	-	-
17	57/14	M	79	gonadotroph adenoma	+	2	M	newly diagnosed	-	-	-	-	-	+/-	+	+	<1%	+	72.3 %	17.2	18
18	9/13	M	59	gonadotroph adenoma	+	3	M	newly diagnosed	-	-	-	-	-	-	+	-	<3%	+	75.2 %	23.9	34.8
19	1/16	M	64	gonadotroph adenoma	+	3	M	newly diagnosed	-	-	-	-	-	-	+	+	<3%	-	71.9 %	2.6	2.9
20	11/14	F	40	gonadotroph adenoma	+	3	M	recurrent	+	-	-	-	-	+	+	+/-	<1%	-	65.5 %	24.8	25.3
21	14/12	M	61	gonadotroph adenoma	+	3	M	newly diagnosed	-	-	-	-	-	+	+	+/-	<1%	-	70.9 %	1.7	2.4
22	15/14	F	57	gonadotroph adenoma	-	2	m	newly diagnosed	-	-	-	-	-	-	-	+/-	<3%	-	51.9 %	18.7	38.8
23	18/14	F	75	gonadotroph adenoma with oncocytic features	-	2	M	newly diagnosed	-	-	-	-	-	+	+	-	<1%	-	65.9 %	4.6	5.5
24	2/13	M	61	gonadotroph adenoma	+	2	M	newly diagnosed	-	-	-	-	-	+	+	-	<1%	-	74.6 %	0.8	1.3
25	2/15	M	52	gonadotroph adenoma	-	1	m	newly diagnosed	-	-	-	-	-	-	+	-	<3%	-	69.3 %	33.4	30.7
26	20/14	M	57	gonadotroph adenoma with oncocytic features	+	4	M	newly diagnosed	-	-	-	-	-	-	+	-	<1%	-	70.5 %	334.7	404.4
27	20/16	F	69	gonadotroph adenoma with oncocytic features	+	3	M	recurrent	-	-	-	-	-	+	+	+	<1%	-	76.7 %	244.1	198.4
28	21/14	M	62	gonadotroph adenoma	-	2	M	newly diagnosed	-	-	-	-	-	+	+	-	<1%	-	67.8 %	48.4	41.2
29	21/15	F	52	gonadotroph adenoma/null cell adenoma	+	4	M	newly diagnosed	-	-	-	-	-	-	-	-	<3%	-	59.0 %	5.7	5.6
30	21/16	F	59	gonadotroph adenoma	+	2	M	newly diagnosed	-	-	-	-	-	+	+	+	<1%	-	69.5 %	645.4	470.8
31	22/14	M	58	gonadotroph adenoma with oncocytic features	+	3	M	newly diagnosed	-	-	-	-	-	+	+	+/-	<1%	-	68.4 %	38.6	39
32	23/15	F	75	gonadotroph adenoma	+	3	M	newly diagnosed	-	-	-	-	-	+	+	+	<1%	-	75.8 %	9.7	12
33	27/16	F	46	gonadotroph adenoma ("alphoma")	+	4	M	recurrent	-	-	-	-	-	-	-	+	>3%	-	71.9 %	14.3	17.3
34	29/16	F	60	gonadotroph adenoma/null cell adenoma	+	2	M	newly diagnosed	+	-	-	-	-	-	-	-	<3%	-	37.5 %	511.5	428.6
35	3/15	F	65	gonadotroph adenoma with oncocytic features	+	2	M	newly diagnosed	-	-	-	-	-	+	+	-	>3%	-	57.1 %	2.5	2.4
36	3/16	M	59	gonadotroph adenoma	+	4	M	recurrent	+	-	-	-	-	-	+	+	<3%	-	68.9 %	418.4	389.4
37	22/16	F	50	gonadotroph adenoma	-	2	m	newly diagnosed	-	-	-	-	-	+	+	+	<3%	-	68.6 %	10.8	15.4
38	33/15	M	74	gonadotroph adenoma	+	3	M	newly diagnosed	-	-	-	-	-	+	+	+	<1%	-	72.8 %	4.1	4.8
39	33/16	F	55	gonadotroph adenoma	-	2	M	newly diagnosed	-	-	-	-	-	-	+	+	<1%	-	71.2 %	135.7	120.3
40	35/15	M	69	gonadotroph adenoma	+	4	M	newly diagnosed	-	-	-	-	-	-	-	+	<1%	-	60.5 %	45.1	40.9
41	38/10	M	52	gonadotroph adenoma	+	3	m	recurrent	+	-	-	-	-	+/-	+	-	<1%	-	77.4 %	5.9	8.5
42	4/13	F	49	gonadotroph adenoma/null cell adenoma	+	2	M	newly diagnosed	-	-	-	-	-	-	-	-	<1%	-	55.1 %	-	-
43	4/16	F	52	gonadotroph adenoma with oncocytic features	+	3	M	newly diagnosed	-	-	-	-	-	-	+	+	<3%	-	72.2 %	1.5	1.5
44	41/16	M	69	gonadotroph adenoma	-	2	M	newly diagnosed	-	-	-	-	-	+	+	-	<1%	-	71.6 %	4	5.5
45	42/16	F	65	gonadotroph adenoma	+	3	m	newly diagnosed	-	-	-	-	-	+	+	+	<1%	-	67.6 %	109.3	95.2
46	47/14	F	50	gonadotroph adenoma	+	3	M	newly diagnosed	-	-	-	-	-	+/-	+/-	+/-	<1%	-	73.2 %	554.8	455.9
47	48/15	M	77	gonadotroph adenoma	+	2	M	recurrent	-	-	-	-	-	+	+	+	<3%	-	62.8 %	54.6	47.9
48	49/12	F	49	gonadotroph adenoma	+	3	M	newly diagnosed	-	-	-	-	-	+	+	+/-	<3%	-	71.5 %	192	214.1
49	5/14	F	58	gonadotroph adenoma/null cell adenoma	+	2	M	newly diagnosed	-	-	-	-	-	-	-	-	<3%	-	61.8 %	17.6	19.6
50	50/12	M	53	gonadotroph adenoma with oncocytic features	+	3	M	recurrent	-	-	-	-	-	+	+	-	>3%	-	75.2 %	1.5	2.1
51	51/10	M	58	gonadotroph adenoma	+	3	m	newly diagnosed	-	-	-	-	-	+	+	-	~ 1%	-	70.8 %	17.4	33.4
52	52/14	F	57	gonadotroph adenoma	-	2	m	newly diagnosed	-	-	-	-	-	+	-	-	<1%	-	70.6 %	13.5	12.8
53	52/15	M	56	gonadotroph adenoma	+	3	M	newly diagnosed	-	-	-	-	-	+	+	+	<1%	-	65.8 %	24.3	22.6
54	55/15	F	58	gonadotroph adenoma	-	1	M	newly diagnosed	-	-	-	-	-	+	+	+	<1%	-	69.4 %	23.5	19
55	57/15	F	67	gonadotroph adenoma	+	2	M	newly diagnosed	-	-	-	-	-	+	+	+	<1%	-	76.5 %	-	-
56	58/15	M	37	gonadotroph adenoma with oncocytic features	+	2	M	newly diagnosed	-	-	-	-	-	-	+	+	<1%	-	74.9 %	2.5	2.9
57	59/16	M	66	gonadotroph adenoma	-	2	m	recurrent	-	-	-	-	-	+	+	+	<1%	-	72.1 %	-	-
58	6/14	M	63	gonadotroph adenoma	-	2	M	newly diagnosed	-	-	-	-	-	-	+	-	<1%	-	73.9 %	5.1	4
59	60/15	F	79	gonadotroph adenoma with oncocytic features	+	3	M	newly diagnosed	-	-	-	-	-	-	+	-	<3%	-	66.2 %	24.9	19.5
60	61/15	M	72	gonadotroph adenoma with oncocytic features	+	3	M	newly diagnosed	-	-	-	-	-	-	+	-	<1%	-	68.5 %	105.7	85.5
61	61/16	M	51	gonadotroph adenoma/null cell adenoma	+	2	m	newly diagnosed	+	-	-	-	-	-	-	-	<3%	-	66.9 %	7.2	8
62	63/15	M	70	gonadotroph adenoma with oncocytic features	+	3	M	recurrent	-	-	-	-	-	-	+	+	<1%	-	67.2 %	1.3	1.3
63	65/15	F	60	gonadotroph adenoma with oncocytic features/"alphoma"	+	3	M	newly diagnosed	-	-	-	-	-	-	-	+	<1%	-	56.4 %	29.7	39.1
64	66/15	M	65	gonadotroph adenoma	-	2	m	newly diagnosed	-	-	-	-	-	-	+	+	<3%	-	74.1 %	12.6	11.5
65	69/15	M	67	gonadotroph adenoma with oncocytic features	-	2	M	newly diagnosed	-	-	-	-	-	-	+	+	<1%	-	72.9 %	99.1	87.1
66	7/14	F	73	gonadotroph adenoma/null cell adenoma	-	2	M	newly diagnosed	-	-	-	-	-	-	-	-	<3%	-	74.2 %	2	2.2
67	7/15	F	58	gonadotroph adenoma with oncocytic features	+	2	M	newly diagnosed	-	-	-	-	-	+	+	-	<3%	-	66.1 %	12.1	13.7
68	73/15	M	71	gonadotroph adenoma	+	3	m	recurrent	+	-	-	-	-	+	+	-	>3%	-	70.7 %	9.3	10.1
69	74/15	M	54	gonadotroph adenoma with oncocytic features	-	2	m	newly diagnosed	-	-	-	-	-	+	+	+	<3%	-	74.8 %	4.2	4.8
70	75/15	F	53	gonadotroph adenoma	+	2	M	newly diagnosed	+	-	-	-	-	+	+	-	<1%	-	72.8 %	5	4.7
71	78/15	F	76	gonadotroph adenoma	+	3	M	newly diagnosed	-	-	-	-	-	-	+	+	<1%	-	72.5 %	3.5	4.1
72	79/15	F	82	gonadotroph adenoma/null cell adenoma	+	3	M	newly diagnosed	-	-	-	-	-	-	-	-	<1%	-	64.5 %	239.1	235.2
73	8/13	M	73	gonadotroph adenoma	+	2	M	newly diagnosed	-	-	-	-	-	-	+	+/-	<1%	-	63.0 %	44.3	42.1
74	8/14	M	34	gonadotroph adenoma	-	2	M	newly diagnosed	+	-	-	-	-	-	+/-	-	<1%	-	73.4 %	4.9	5.5
75	80/11	M	55	gonadotroph adenoma	+	4	M	newly diagnosed	+	-	-	-	-	+	+	+	<3%	-	63.4 %	13.2	14.9
76	80/15	M	76	gonadotroph adenoma	-	2	M	newly diagnosed	-	-	-	-	-	+	-	+	<3%	-	76.8 %	3.7	4.1
77	82/15	F	71	gonadotroph adenoma	-	2	M	newly diagnosed	-	-	-	-	-	+	-	+	<3%	-	76.4 %	108.6	128.7
78	86/15	M	63	gonadotroph adenoma/"alphoma"	+	3	M	newly diagnosed	-	-	-	-	-	-	-	+	<1%	-	72.1 %	5.4	5.4
79	9/14	M	80	gonadotroph adenoma	+	3	M	newly diagnosed	-	-	-	-	-	-	+	+/-	<1%	-	72.7 %	3.2	5.1
80	9/15	M	71	gonadotroph adenoma	+	4	M	recurrent	-	-	-	-	-	+	+	+	<3%	-	74.6 %	0.9	1.1
Characteristics of normal pituitary samples donors (samples from autopsy used for DNA methylation analysis)
nr	code	sex	age (years)	PMR (hours)	Line-1 DNA methylation levels
1	31/15	F	53	46	75.04 %
2	32/15	M	63	36	78.93 %
3	36/15	M	64	25	78.09 %
4	37/15	M	44	41	76.25 %
5	38/15	F	46	28	80.89 %
Characteristics of normal pituitary samples donor (normal pituitary FFPE samples from surgery of Rathke's cleft cyst used for immunohistochemistry)
nr	code	sex	age (years)
1	3766	F	36
2	8893	F	24
3	1579	F	40

## Sheet: PCR primers
Supplementary Table S2. Sequences of PCR primers.
pyrosequencing primers
	forward (5' → 3')	reverse (5' → 3')	sequencing (5' → 3')	sequence to analyze
LINE-1	TTTTGAGTTAGGTGTGGGATATA	AAAATCAAAAAATTCCCTTTC	AGTTAGGTGTGGGATATAGT	TTYGTGGTGYGTYGTTTTTTAAGTYGG
qRT-PCR primers (human)
	forward (5' → 3')	reverse (5' → 3')
L1-ORF1	AGAACGCCACAAAGATACTCCTCG	CTCTCTTCTGGCTTGTAGGGTTTCTG
L1-ORF2	AAACTGAACAACCTGCTCCTGAATG	CTACACACTGCTTTGAATGCGTCC
qRT-PCR primers (mouse)
	forward (5' → 3')	reverse (5' → 3')
L1-ORF1	AGATCTGGAACCATAGATG	TTCTCATTGTGTCCTGGATT
L1-ORF2	GGAGGGACATTTCATTCTCATCA	GCTGCTCTTGTATTTGGAGCATAGA
